# Supplementary material for: Effects of the support on bifunctional one-step synthesis of methylal via methanol oxidation catalysed by Fe–Mo-based bifunctional catalysts
Source: Royal Society of Chemistry journal article supplement (doi:10.1039/d0se01194k), 2020-11-04
Supplement: d0se01194k1.pdf [file d0se01194k1.pdf]

## Appendix A. Supplementary data:

### Effects of support on bifunctional one-step synthesis of methylal via methanol oxidation catalyzed by Fe-Mo-based catalyst

Meng Yuan<sup>a,d</sup>, Ruiyuan Tang<sup>b</sup>, Xiangyu Sun<sup>c</sup>, Zhimei Zhang<sup>a,d</sup>,  
Yuanyu Tian<sup>a,d,e\*</sup>, Yingyun Qiao<sup>a,d\*</sup>

<sup>a</sup> State Key Laboratory of Heavy Oil Processing, China University of Petroleum (East China), Qingdao Shandong 266580, China.

<sup>b</sup> Research Center of Petroleum Processing & Petrochemicals, Xi'an Shiyu University, Xi'an, Shanxi, 710065, China

<sup>c</sup> College of petroleum Engineering, China University of Petroleum (East China), Qingdao 266580, PR China

<sup>d</sup> Shandong Engineering and Technology Research Center of High Carbon Low Carbonization, China University of Petroleum (East China), Qingdao 266580, PR China

\*Corresponding author. Tel.: +86-0532-86057766. E-mail addresses: tianyy1008@126.com (Y. Tian); qiao\_yingyun@126.com (Y. Qiao)

#### Content:

| Item     | Page |
|----------|------|
| Table S1 | 2    |
| Table S2 | 3    |
| Table S3 | 4    |
| Table S4 | 5    |
| Table S5 | 6    |
| Table S6 | 7    |
| Table S7 | 8    |
| Fig. S1  | 9    |
| Fig. S2  | 10   |
| Fig. S3  | 11   |

**Table S1.** Specific surface areas and pore structure data of the catalysts.

| Catalyst                                  | Specific surface area (m <sup>2</sup> /g) | Pore size (nm) | Pore volume (cm <sup>3</sup> /g) |
|-------------------------------------------|-------------------------------------------|----------------|----------------------------------|
| Mo:Fe(2) /HY zeolite                      | 225.31                                    | 3.34           | 0.146                            |
| Mo:Fe(2) / Al <sub>2</sub> O <sub>3</sub> | 313.52                                    | 2.13           | 0.109                            |
| Mo:Fe(2) /HZSM-5 (40)                     | 325.32                                    | 2.15           | 0.110                            |
| Mo:Fe(2) /HZSM-5 (80)                     | 316.47                                    | 2.28           | 0.099                            |
| Mo:Fe(2) / SiO <sub>2</sub>               | 309.88                                    | 2.23           | 0.089                            |

**Table S2.** The NH<sub>3</sub>-TPD results of the catalysts

| Catalyst                                  | Weak acid |                                          | Stronger acid |                                          |
|-------------------------------------------|-----------|------------------------------------------|---------------|------------------------------------------|
|                                           | T(°C)     | NO.( $\mu\text{mol}\cdot\text{g}^{-1}$ ) | T(°C)         | NO.( $\mu\text{mol}\cdot\text{g}^{-1}$ ) |
| Mo:Fe(2) /HY zeolite                      | 200       | 651.93                                   | 500           | 220.59                                   |
| Mo:Fe(2) / Al <sub>2</sub> O <sub>3</sub> | 200       | 158.89                                   | 375           | 90.22                                    |
| Mo:Fe(2) /HZSM-5 (40)                     | 225       | 814.74                                   | 475           | 407.14                                   |
| Mo:Fe(2) /HZSM-5 (80)                     | 200       | 659.83                                   | 450           | 244.09                                   |
| Mo:Fe(2) / SiO <sub>2</sub>               | --        | --                                       | --            | --                                       |

**Table S3.** Acidic Properties of catalysts with different carriers.

| catalyst                                  | Lewis <sup>a</sup> | Brönsted <sup>b</sup> | B/L <sup>c</sup> | total |
|-------------------------------------------|--------------------|-----------------------|------------------|-------|
| Mo-Fe (2) /HY zeolite                     | 1.12               | 4.81                  | 4.29             | 5.93  |
| Mo-Fe (2)/ Al <sub>2</sub> O <sub>3</sub> | 1.10               | 3.44                  | 3.13             | 4.54  |
| Mo-Fe (2) /HZSM-5 (40)                    | 1.87               | 4.46                  | 2.39             | 6.33  |
| Mo-Fe (2)/HZSM-5 (80)                     | 0.91               | 4.11                  | 4.52             | 5.02  |
| Mo-Fe (2) / SiO <sub>2</sub>              | 1.14               | 0                     | 0                | 1.14  |
| -----                                     | -----              | -----                 | -----            | ----- |
| HZSM-5 (40)                               | 0.99               | 4.67                  | 4.72             | 5.66  |

<sup>a</sup>Lewis' range: 1432~1460 cm<sup>-1</sup>.<sup>b</sup>Bands' range: 1510~1560 cm<sup>-1</sup>. <sup>c</sup>Brönsted/Lewis bands ratio.

**Table S4.** Specific surface areas and pore structure data of the catalysts.

| Catalyst                       | Specific surface area<br>(m <sup>2</sup> /g) | Pore size<br>(nm) | Pore volume<br>(cm <sup>3</sup> /g) |
|--------------------------------|----------------------------------------------|-------------------|-------------------------------------|
| Mo:Fe(2) /HY zeolite           | 225.31                                       | 3.34              | 0.146                               |
| Mo:Fe(2) /HZSM-5 (40)          | 325.32                                       | 2.15              | 0.110                               |
| Mo:Fe(2) /HZSM-5 (80)          | 316.47                                       | 2.28              | 0.099                               |
| Mo:Fe(2)/HY zeolite+HZSM-5(80) | 231.88                                       | 3.49              | 0.160                               |
| Mo:Fe(2) / HZSM-5 (40+80)      | 321.37                                       | 2.13              | 0.099                               |
| Mo:Fe(2) / HZSM-5 (80+80)      | 305.32                                       | 2.18              | 0.094                               |

**Table S5.** The NH<sub>3</sub>-TPD results of the catalysts

| Catalyst                       | Weak acid |                                          | Middle stronger acid |                                          | Total  | Stronger acid |                                          |
|--------------------------------|-----------|------------------------------------------|----------------------|------------------------------------------|--------|---------------|------------------------------------------|
|                                | T/°C      | NO.( $\mu\text{mol}\cdot\text{g}^{-1}$ ) | T/°C                 | NO.( $\mu\text{mol}\cdot\text{g}^{-1}$ ) |        | T/°C          | NO.( $\mu\text{mol}\cdot\text{g}^{-1}$ ) |
| Mo:Fe(2)/HY zeolite+HZSM-5(80) | 225       | 1136.4                                   | --                   | --                                       | 1136.4 | 490           | 464.4                                    |
| Mo:Fe(2) /HZSM-5 (40+80)       | 175       | 515.2                                    | 275                  | 932.6                                    | 1447.8 | 475           | 616.8                                    |
| Mo:Fe(2) /HZSM-5 (80+80)       | 175       | 639.3                                    | 275                  | 821.5                                    | 1460.8 | 450           | 570.6                                    |

**Table S6.** Acidic Properties of catalysts with Mo/Fe different ratio.

| catalyst                       | Lewis <sup>a</sup> | Brönsted <sup>b</sup> | B/L <sup>c</sup> | total |
|--------------------------------|--------------------|-----------------------|------------------|-------|
| Mo:Fe(2)/HY zeolite+HZSM-5(80) | 1.21               | 4.22                  | 3.49             | 5.43  |
| Mo:Fe(2) /HZSM-5 (40+80)       | 1.62               | 4.19                  | 2.59             | 5.81  |
| Mo:Fe(2) /HZSM-5 (80+80)       | 1.23               | 4.71                  | 3.82             | 5.94  |

<sup>a</sup>Bands' range: 1432~1460 cm<sup>-1</sup>. <sup>b</sup>Bands' range: 1510~1560 cm<sup>-1</sup>. <sup>c</sup>Brönsted/Lewis bands ratio.

**Table S7.** Catalytic activity of Fe-Mo-based catalysts with different Si/Al ratios.

| Catalyst                   | Methanol conversion (%) | Product selectivity (%) |      |       |      |                 | Yield |
|----------------------------|-------------------------|-------------------------|------|-------|------|-----------------|-------|
|                            |                         | DMM                     | FA   | MF    | DME  | CO <sub>x</sub> |       |
| Mo-Fe (2) /HZSM-5 (20)     | 30.81                   | 48.28                   | 8.9  | 40.03 | 2.02 | 0.77            | 14.05 |
| Mo-Fe (2) /HZSM-5 (60)     | 25.71                   | 62.77                   | 9.11 | 24.67 | 2.91 | 0.54            | 16.14 |
| Mo-Fe (2) /HZSM-5 (100)    | 21.89                   | 70.01                   | 10.1 | 14.34 | 5.14 | 0.41            | 16.73 |
| Mo-Fe (2) /HZSM-5 (80+20)  | 60.77                   | 60.1                    | 6.10 | 26.83 | 6.66 | 0.31            | 36.52 |
| Mo-Fe (2) /HZSM-5 (80+60)  | 80.17                   | 79.44                   | 5.61 | 11.6  | 3.01 | 0.34            | 63.69 |
| Mo-Fe (2) /HZSM-5 (80+100) | 84.41                   | 85.77                   | 2.60 | 8.12  | 3.51 | 0.29            | 72.39 |



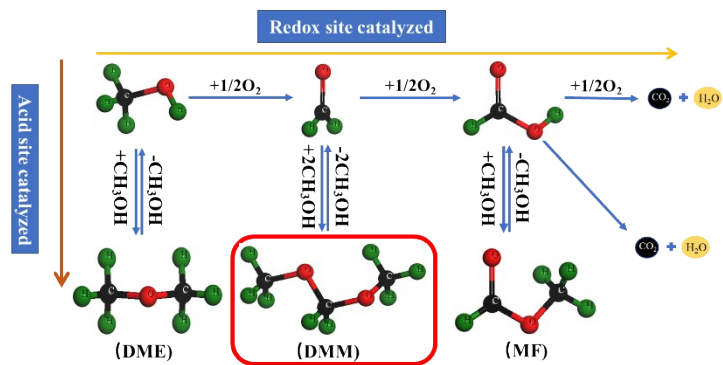

Fig. S1. Scheme of oxidation/dehydration of methanol

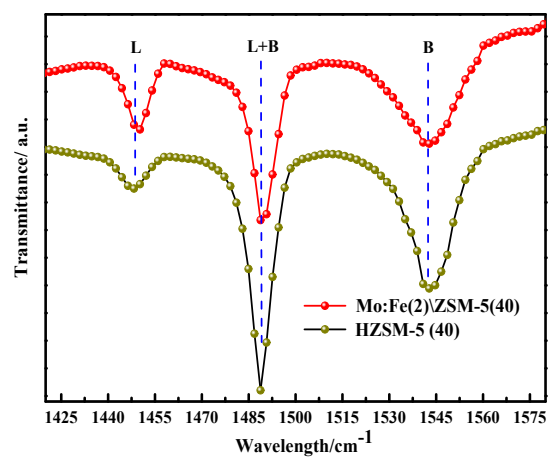

**Fig.S2.** FTIR spectra of pyridine adsorbed on the ZSM-5 (40) and Mo: Fe (2) / HZSM-5 (40) catalysts.

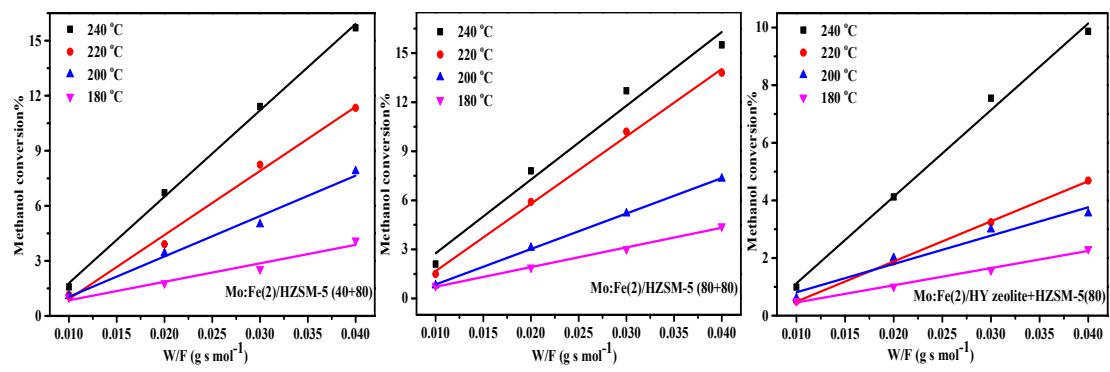

**Fig. S3.** Variation of methanol conversion with W/F for different catalysts.
